# Supplementary material for: Assessment of 222 Radon progeny loss in long tubing based on staticfilter measurements in the laboratory and in the field
Source: Copernicus journal article supplement (doi:10.5194/amt-2016-112), 2016-06-30

## Supplementary Figures to:

### 5 **Assessment of $^{222}\text{Rn}$ progeny loss in long tubing based on static filter measurements in the laboratory and in the field**

Ingeborg Levin<sup>1</sup>, Dominik Schmithüsen<sup>1</sup>, Alex Vermeulen<sup>2</sup>

<sup>1</sup>Institut für Umweltphysik (IUP), Heidelberg University, 69120 Heidelberg, Germany

<sup>2</sup>Energy research Centre of the Netherlands (ECN), 1755LE Petten, The Netherlands, now at: ICOS ERIC - Carbon Portal, Lund, Sweden

10 *Correspondence to:* Ingeborg Levin ([Ingeborg.Levin@iup.uni-heidelberg.de](mailto:Ingeborg.Levin@iup.uni-heidelberg.de))

Supplementary Figures S1-S9:

5 Evaluation of  $^{214}\text{Po}$  activity concentrations using the empirical correction functions Eqs. 1 and 2 for loss of  $^{222}\text{Rn}$  progeny in Decabon tubing of 8.2 mm ID and various lengths (16 m to 200 m). The upper left panels show the ratios between the line test monitor (LTM) sampling air via the Decabon tubing and the routine monitor (HD-R) sampling via a 0.5m Teflon tube, the lower left panels show the same ratio after correction of the LTM activities, the upper right panels show the correlation between HD-R and corrected LTM activity concentrations, the lower right panels display the residuum of activity concentrations from the fitted regression lines in the upper right panels.

16m LTM correction and evaluation

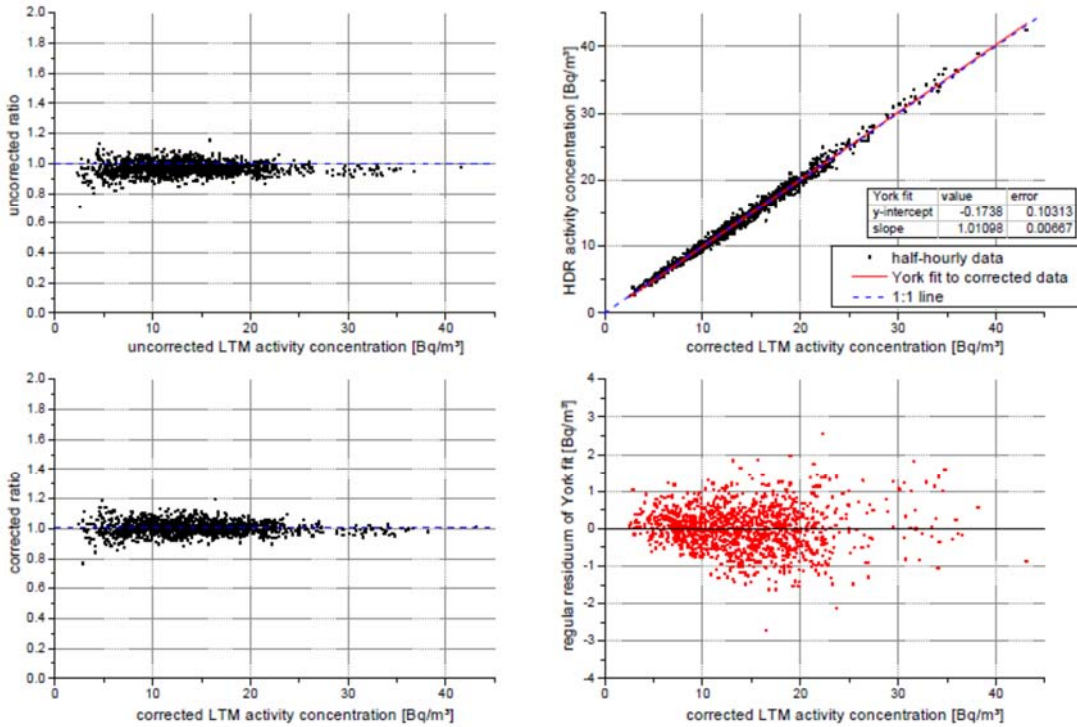

### 30m LTM correction and evaluation

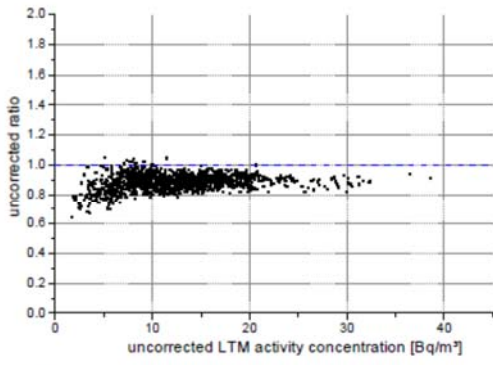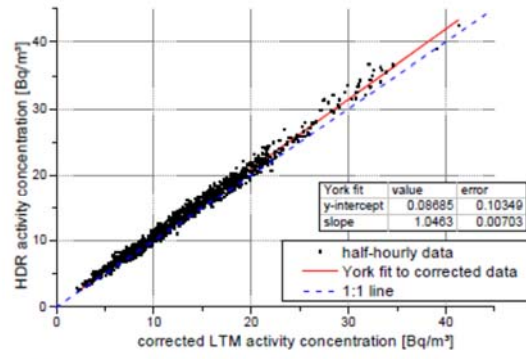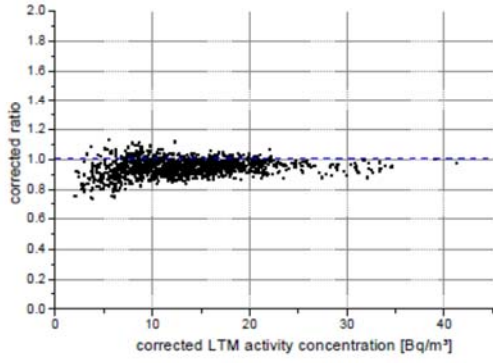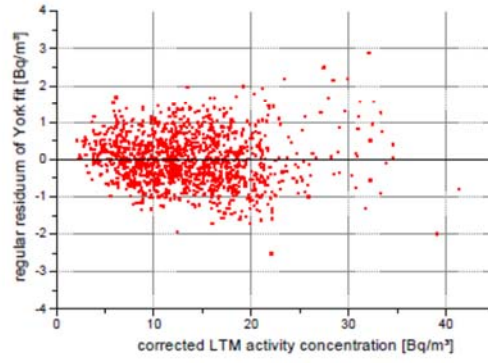

# 46m LTM correction and evaluation

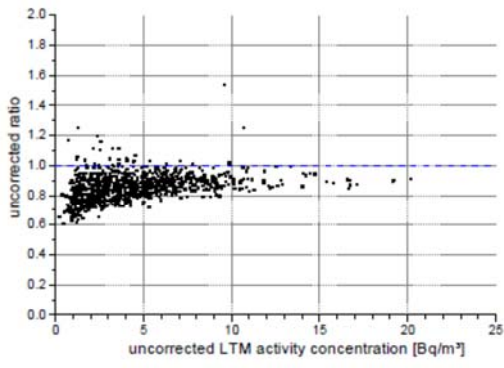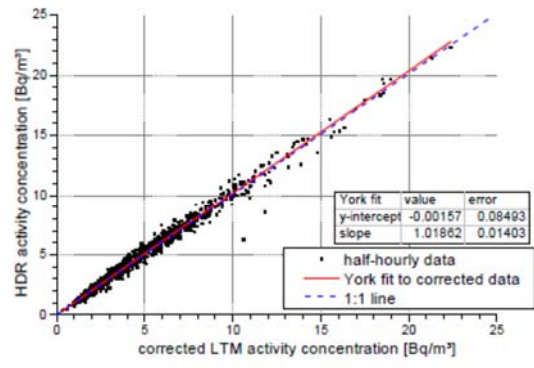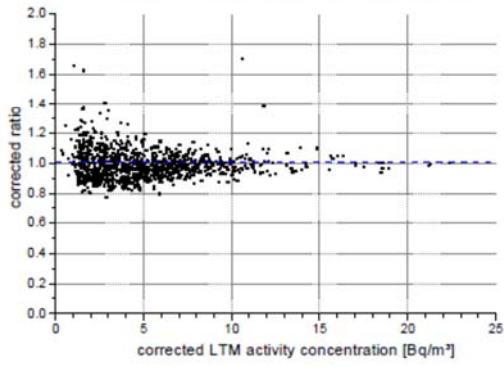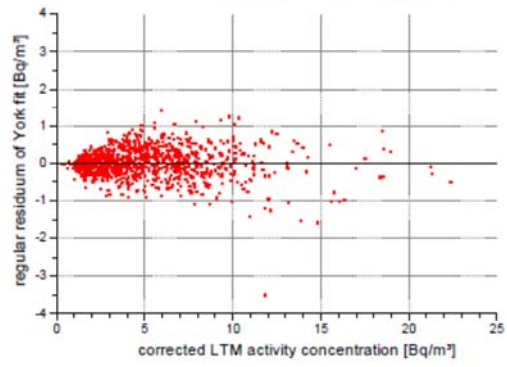

## 52m LTM correction and evaluation

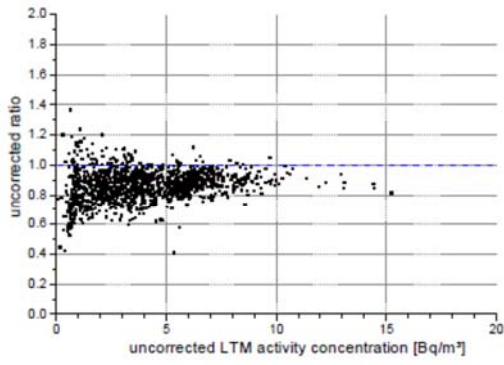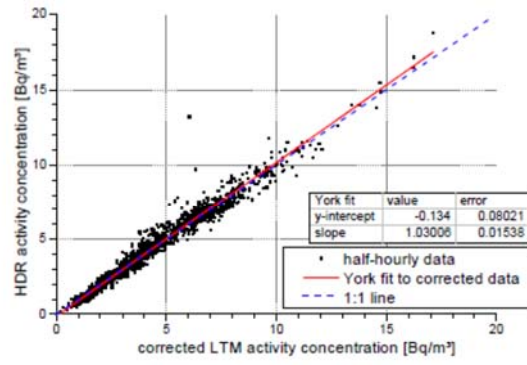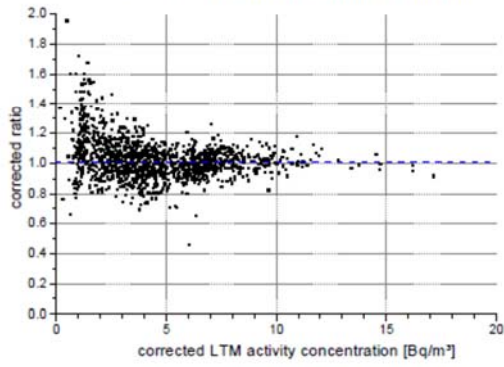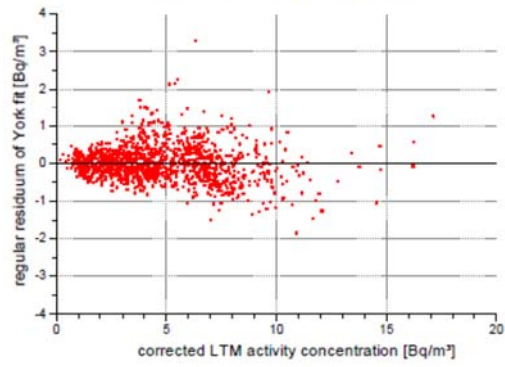

## 82m LTM correction and evaluation

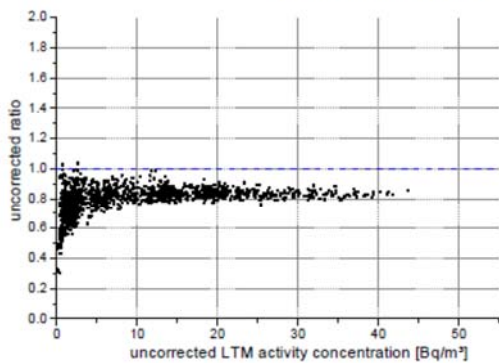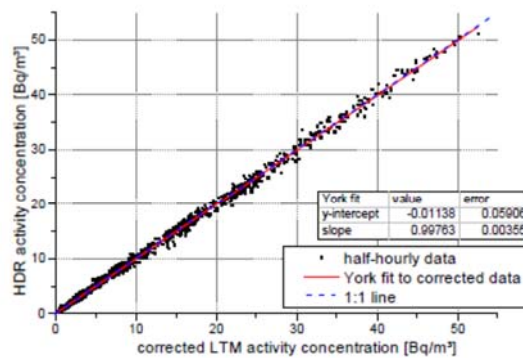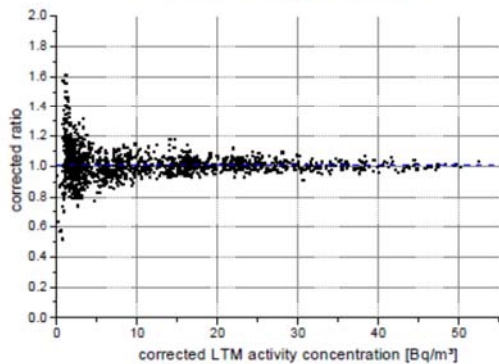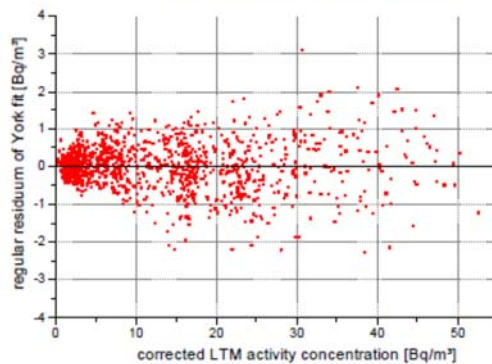

# 100m LTM correction and evaluation

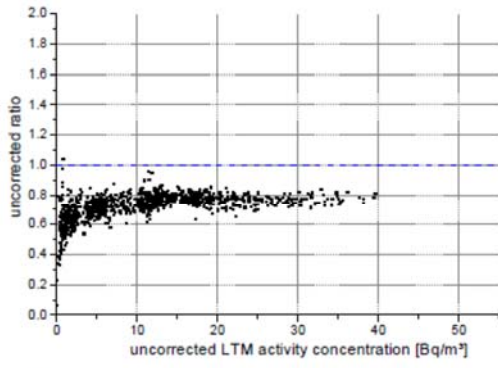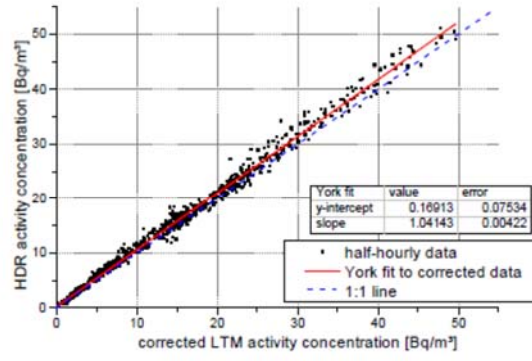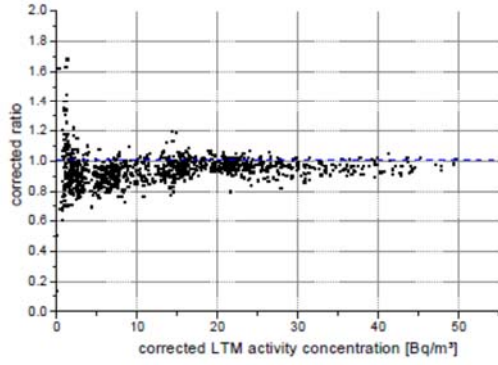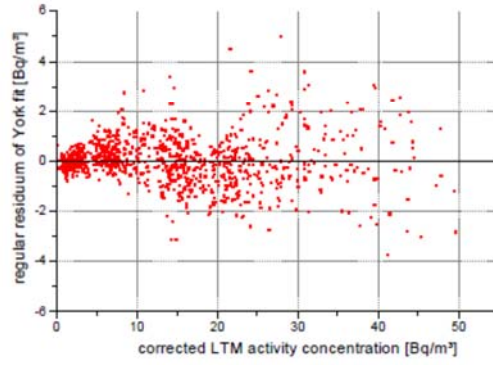

# 130m LTM correction and evaluation

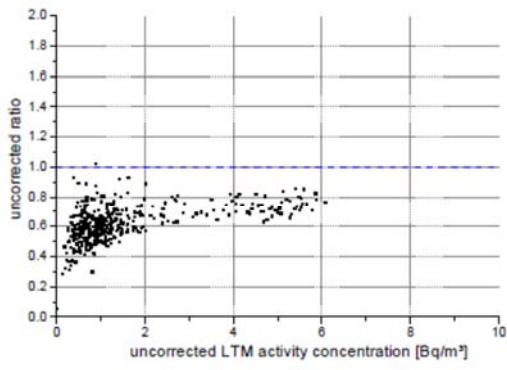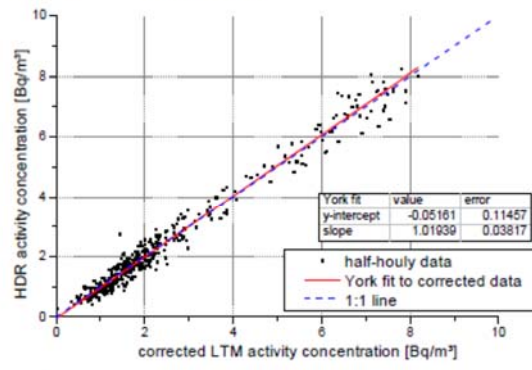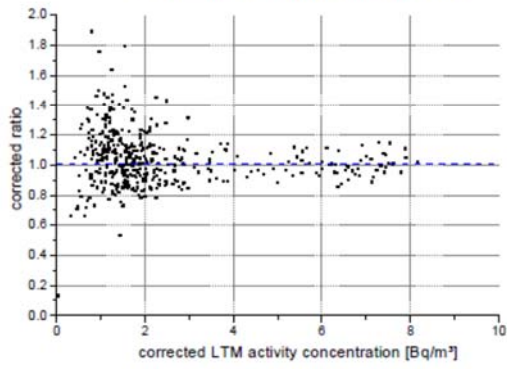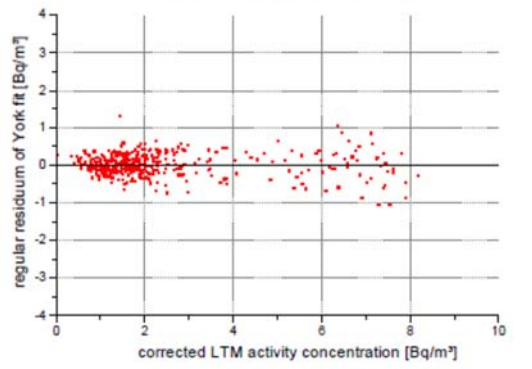



# 152m LTM correction and evaluation

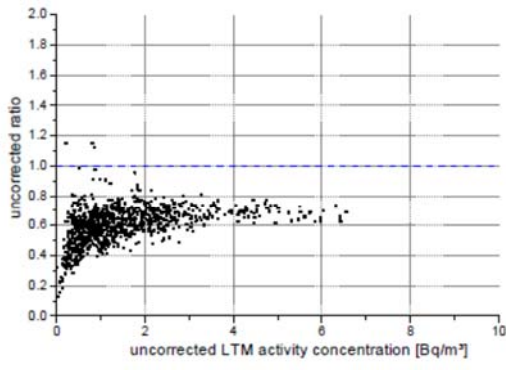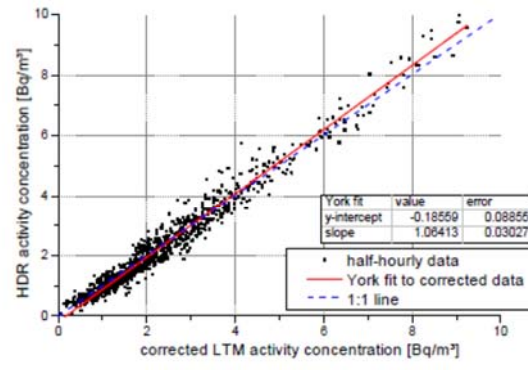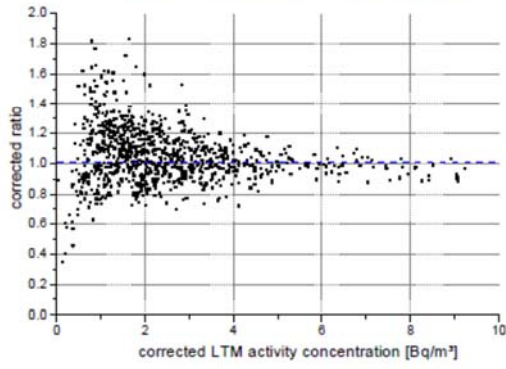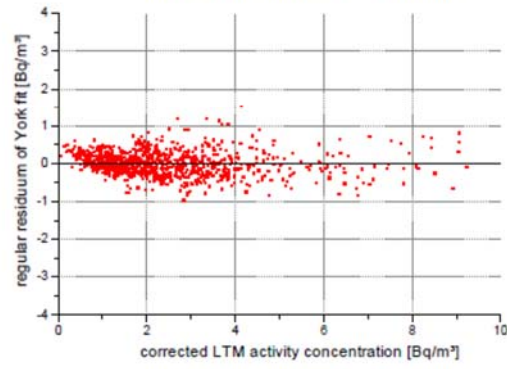

## 200m LTM correction and evaluation

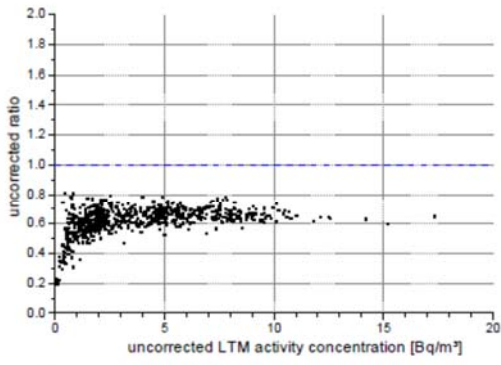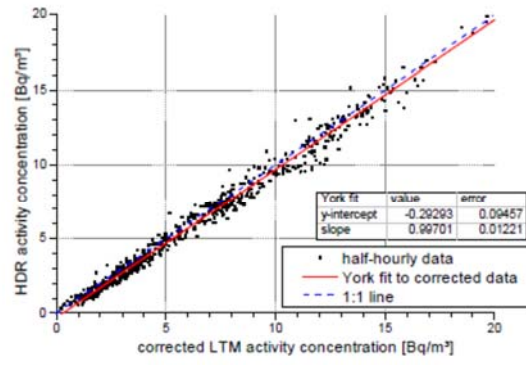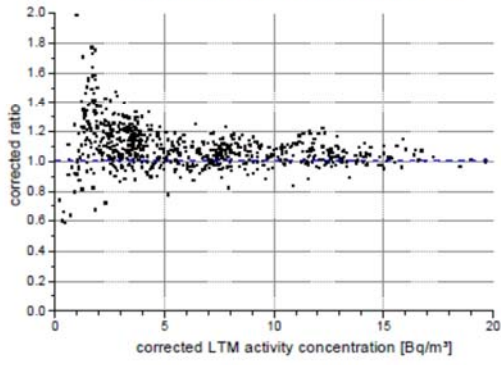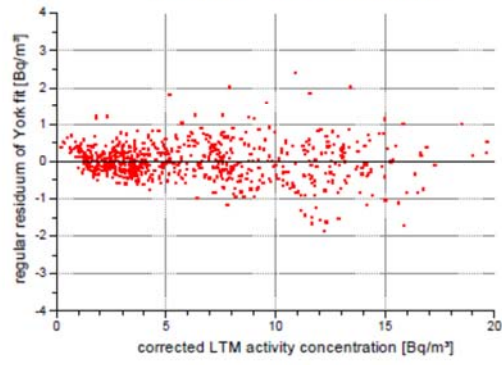

Supplement: Supplementary file 1 [file amt-2016-112-supplement.pdf]
